# Supplementary material
Source: publisher figshare collection journal article supplement (https://sage.figshare.com/ndownloader/files/22029879)
Supplement: Supplementary file 1 [file 22029879]

**Table S1.** Fit indices for the measurement invariance tests for effortful control, fearfulness and frustration in the n=209 sample

|                          |                                                                                                                                                                             | Fit Indices    |           |                 |                         |             |             |              |
|--------------------------|-----------------------------------------------------------------------------------------------------------------------------------------------------------------------------|----------------|-----------|-----------------|-------------------------|-------------|-------------|--------------|
|                          |                                                                                                                                                                             | $\chi^2$       | <i>df</i> | Free parameters | RMSEA (95% CI)          | CFI         | TLI         | WRMR         |
| <b>Effortful control</b> |                                                                                                                                                                             |                |           |                 |                         |             |             |              |
| i                        | Configural invariance                                                                                                                                                       | 101.710        | 45        | 99              | .082 (.061-.104)        | .982        | .972        | 0.865        |
| ii                       | Metric invariance                                                                                                                                                           | 120.478        | 53        | 91              | .083 (.063-.103)        | .979        | .971        | 1.034        |
| iii                      | <i>Strong invariance</i>                                                                                                                                                    | <i>231.123</i> | <i>79</i> | <i>65</i>       | <i>.102 (.087-.117)</i> | <i>.952</i> | <i>.957</i> | <i>1.595</i> |
| <b>Fear</b>              |                                                                                                                                                                             |                |           |                 |                         |             |             |              |
| i                        | Configural invariance                                                                                                                                                       | 9.448          | 8         | 50              | .031 (.000-.095)        | .998        | .995        | 0.417        |
| ii                       | <i>Metric invariance<sup>#</sup></i>                                                                                                                                        | <i>42.800</i>  | <i>12</i> | <i>46</i>       | <i>.118 (.081-.157)</i> | <i>.959</i> | <i>.932</i> | <i>1.033</i> |
| iii                      | <i>Strong invariance</i>                                                                                                                                                    | <i>303.685</i> | <i>25</i> | <i>33</i>       | <i>.245 (.221-.270)</i> | <i>.633</i> | <i>.707</i> | <i>2.981</i> |
| <b>Frustration</b>       |                                                                                                                                                                             |                |           |                 |                         |             |             |              |
| i                        | Configural invariance                                                                                                                                                       | 11.250         | 8         | 52              | .047 (.000-.105)        | .997        | .993        | 0.408        |
| ii                       | Metric invariance                                                                                                                                                           | 19.712         | 12        | 48              | .059 (.000-.104)        | .994        | .990        | 0.641        |
| iii                      | <i>Strong invariance</i>                                                                                                                                                    | <i>77.057</i>  | <i>26</i> | <i>34</i>       | <i>.103 (.077-.130)</i> | <i>.959</i> | <i>.968</i> | <i>1.390</i> |
| i.                       | Configural invariance: Base model with factor loadings, item thresholds and residual variances all freely estimated and time (1 = Age 11, 2 = Age 19) as grouping variable. |                |           |                 |                         |             |             |              |
| ii.                      | Metric invariance: factor loadings are constrained to be equal over time, item thresholds and residual variances freely estimated                                           |                |           |                 |                         |             |             |              |
| iii.                     | Strong invariance: factor loadings and item thresholds are constrained to be equal over time, residual variances are freely estimated                                       |                |           |                 |                         |             |             |              |

Note. Rows *in italic* indicate worsened model fit based on chi-square difference testing (DIFFtest;  $p < .001$ ) and thus rejection of measurement invariance.

Item residuals were allowed to correlate.

**Table S2.** Adjusted  $R^2$  results from the step 1 analyses including disorder load as a (a) linear), (b) quadratic, and (c) logarithmic polynomial to test linearity of the association between disorder load and Age19 personality (n=1089)

|    | Linear disorder load<br>Adjusted $R^2$ | Quadratic disorder load<br>Adjusted $R^2$ | Logarithmic disorder load<br>Adjusted $R^2$ |
|----|----------------------------------------|-------------------------------------------|---------------------------------------------|
| EC | .24                                    | .24                                       | .24                                         |
| FE | .15                                    | .14                                       | .15                                         |
| FR | .19                                    | .19                                       | .19                                         |

EC = effortful control FE = fear, FR = frustration.  $R^2$  did not differ between models including linear disorder load versus quadratic and logarithmic disorder load as predictors, suggesting that the associations between disorder load and Age19 personality is likely linear.
